# Supplementary figures and images for: Hyperglycaemia-induced impairment of endothelium-dependent vasorelaxation in rat mesenteric arteries is mediated by intracellular methylglyoxal levels in a pathway dependent on oxidative stress
Source: PubMed Central journal article supplement — Diabetologia. 2010 Feb 26;53(5):989–1000. doi: 10.1007/s00125-010-1677-0 (PMC2850524; doi:10.1007/s00125-010-1677-0), 2010-02-26

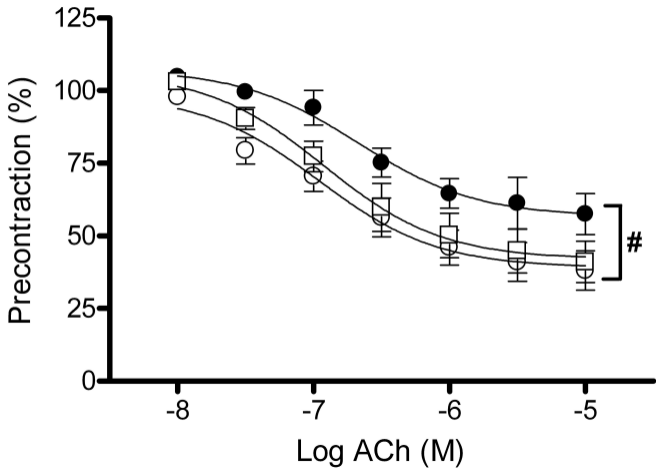

Supplement: 125_2010_1677_MOESM2_ESM.pdf [file 125_2010_1677_MOESM2_ESM.pdf]
